# Supplementary material for: Fe–Ga multiple bonding? Synthesis, spectroscopic and structural characterization of a transition metal complex containing a cationic two-coordinate gallium centre
Source: Royal Society of Chemistry journal article supplement (doi:10.1039/b405943c), 2004-01-01
Supplement: b405943c.doc [file b405943c.doc]

Correspondence and proofs to: Dr Simon Aldridge

at address below

AldridgeS@cardiff.ac.uk

Tel: (029) 20875495

Fax: (029) 20874030

**Fe-Ga Multiple Bonding? Synthesis, Spectroscopic and Structural Characterization of a Transition Metal Complex Containing a Cationic Two-coordinate Gallium Centre**

Natalie R. Bunn, Simon Aldridge,* Deborah L. Coombs, Andrea Rossin, David J. Willock, Cameron Jones and Li-ling Ooi.

School of Chemistry, Cardiff University, PO Box 912, Park Place, Cardiff, UK CF10 3TB.

**Supporting Information**

*xyz* file corresponding to the fully optimised geometry of [{(5-C5Me5)Fe(CO)2}2Ga]+ 2

Full details of the crystal structure of **3** 4

Full details of the crystal structure of **4** 12

Ga 11.516091000 14.045199000 16.978772000

Fe 12.654783000 12.824223000 18.615883000

Fe 10.424746000 15.226920000 15.283539000

O 13.160781000 15.372222000 20.054601000

O 15.098738000 12.908491000 16.943186000

O 11.346568000 17.773024000 16.490183000

O 7.876624000 15.080312000 16.789093000

C 12.946184000 14.383233000 19.490462000

C 14.132875000 12.908948000 17.587529000

C 10.994875000 16.759440000 16.053101000

C 8.889094000 15.133232000 16.226021000

C 11.063608000 11.270948000 18.561402000

C 11.070216000 11.942446000 19.843470000

C 12.354192000 11.682987000 20.474923000

C 13.147818000 10.907078000 19.577897000

C 12.353575000 10.670284000 18.368984000

C 9.858449000 11.057243000 17.679605000

C 9.878784000 12.595059000 20.499660000

C 12.722512000 12.066761000 21.885615000

C 14.513083000 10.334106000 19.861050000

C 12.766113000 9.768817000 17.230457000

C 9.822083000 13.883348000 13.652023000

C 11.259411000 13.798620000 13.801988000

C 11.806883000 15.113724000 13.582142000

C 10.709368000 16.006164000 13.244766000

C 9.490611000 15.265776000 13.298687000

C 8.851796000 12.725712000 13.677608000

C 12.054901000 12.521530000 13.941491000

C 13.274031000 15.459996000 13.511330000

C 10.859266000 17.437519000 12.789170000

C 8.124859000 15.776459000 12.920168000

H 10.136990000 10.909685000 16.629724000

H 9.144825000 11.887316000 17.733315000

H 9.322949000 10.150324000 18.001103000

H 9.326137000 11.855133000 21.099154000

H 9.179544000 13.005045000 19.762559000

H 10.172189000 13.407391000 21.172863000

H 12.218646000 12.985688000 22.205738000

H 13.802243000 12.210281000 22.003720000

H 12.416937000 11.266696000 22.577935000

H 15.077923000 10.959942000 20.561128000

H 15.110182000 10.223320000 18.948588000

H 14.416904000 9.334886000 20.314312000

H 12.593942000 8.715832000 17.502806000

H 13.830919000 9.871804000 16.989842000

H 12.192234000 9.969733000 16.318812000

H 7.858190000 13.031417000 14.025718000

H 9.202395000 11.912956000 14.324435000

H 8.731381000 12.311794000 12.664325000

H 11.519570000 11.763840000 14.525281000

H 13.032587000 12.688320000 14.407310000

H 12.240107000 12.090098000 12.945710000

H 13.638479000 15.346111000 12.478408000

H 13.881881000 14.805222000 14.145852000

H 13.467436000 16.495261000 13.812889000

H 11.002506000 17.462974000 11.697451000

H 11.727502000 17.926710000 13.244452000

H 9.970815000 18.036029000 13.018555000

H 8.027273000 16.851350000 13.108731000

H 7.326970000 15.263236000 13.468928000

H 7.944061000 15.610692000 11.846384000


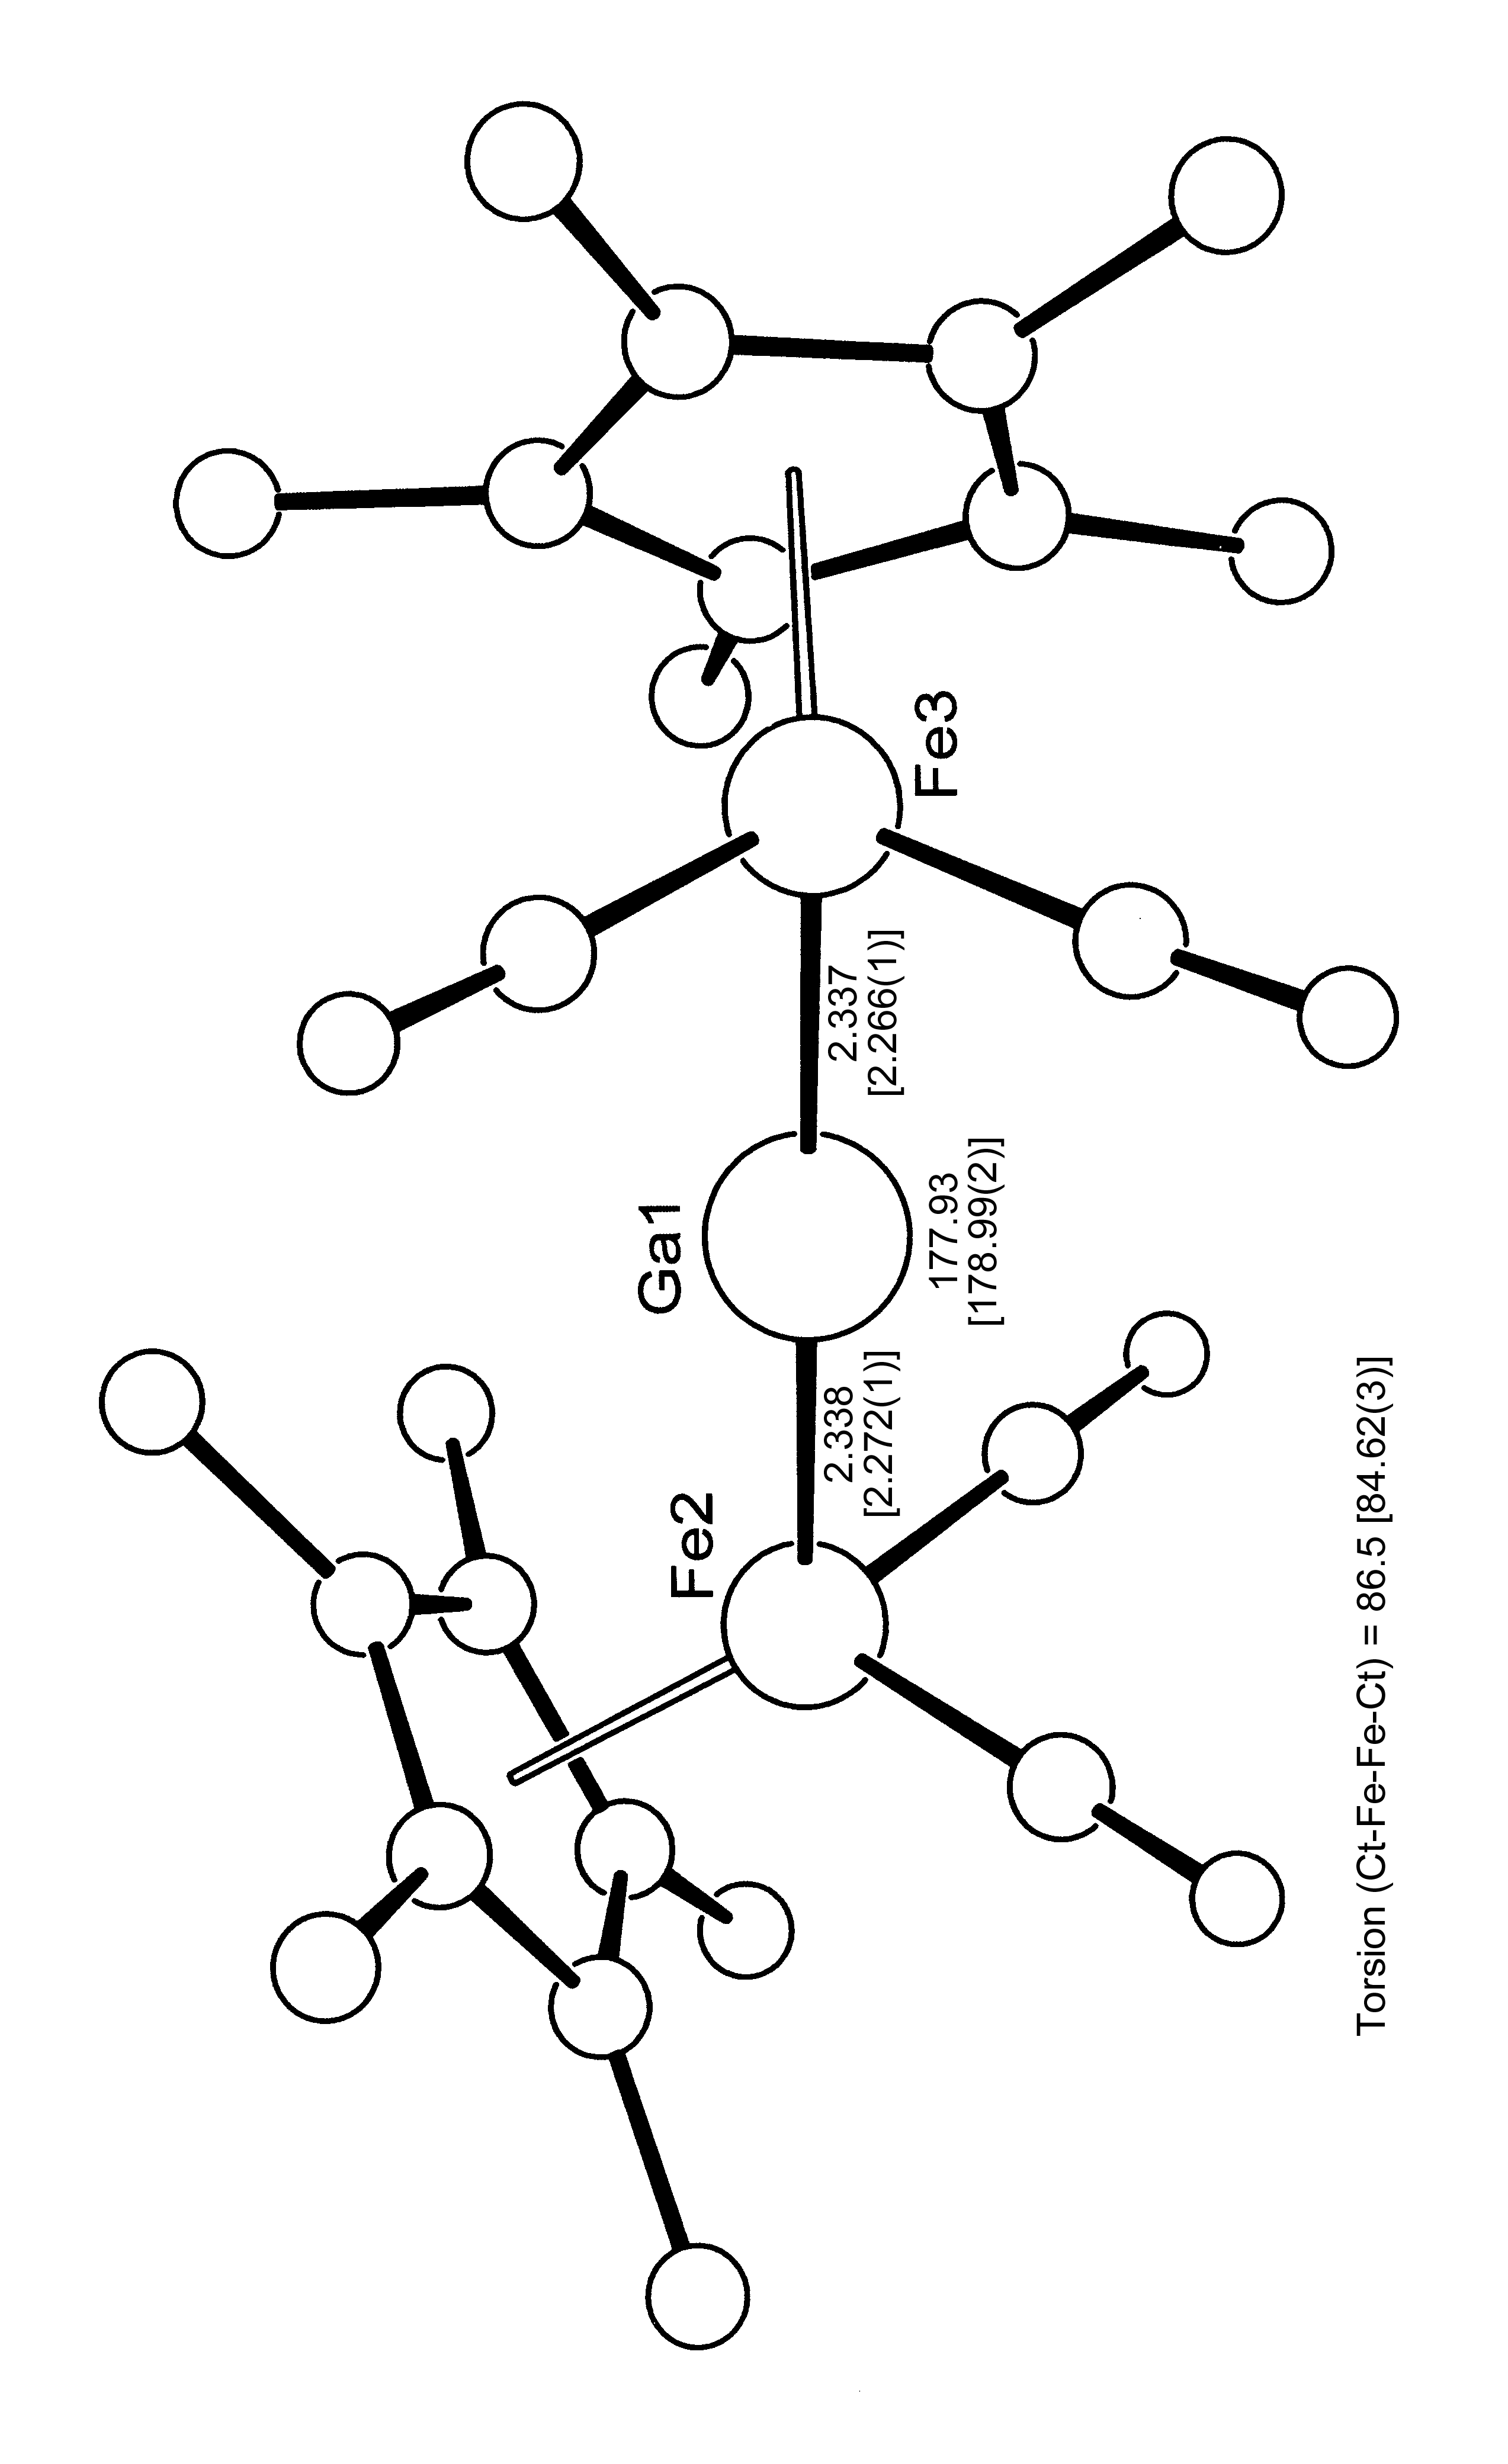


Table 1. Crystal data and structure refinement for **3**.

Identification code sa0401

Empirical formula C24 H30 Cl Fe2 Ga O4

Formula weight 599.34

Temperature 150(2) K

Wavelength 0.71073 Å

Crystal system Orthorhombic

Space group P cnb

Unit cell dimensions a = 11.1946(2) Å = 90°.

b = 12.9307(3) Å = 90°.

c = 16.9269(4) Å  = 90°.

Volume 2450.24(9) Å3

Z 4

Density (calculated) 1.625 Mg/m3

Absorption coefficient 2.397 mm-1

F(000) 1224

Crystal size 0.25 x 0.18 x 0.13 mm3

Theta range for data collection 3.64 to 30.02°.

Index ranges -13<=h<=15, -18<=k<=18, -23<=l<=23

Reflections collected 29314

Independent reflections 3574 [R(int) = 0.1124]

Completeness to theta = 30.02° 99.8 %

Absorption correction Semi-empirical from equivalents

Max. and min. transmission 0.7458 and 0.5856

Refinement method Full-matrix least-squares on F2

Data / restraints / parameters 3574 / 0 / 151

Goodness-of-fit on F2 1.088

Final R indices [I>2sigma(I)] R1 = 0.0486, wR2 = 0.0981

R indices (all data) R1 = 0.0678, wR2 = 0.1050

Largest diff. peak and hole 1.310 and -0.761 e.Å-3

Table 2. Atomic coordinates ( x 104) and equivalent isotropic displacement parameters (Å2x 103)

for **3**. U(eq) is defined as one third of the trace of the orthogonalized Uij tensor.

________________________________________________________________________________

x y z U(eq)

________________________________________________________________________________

C(1) 1351(3) 652(2) 1563(2) 21(1)

C(2) 984(3) 1373(3) 140(2) 22(1)

C(3) 2066(3) 4194(2) 1542(2) 26(1)

C(4) 2445(3) 3543(3) -266(2) 26(1)

C(5) 3866(3) 1398(3) -291(2) 26(1)

C(6) 4330(3) 713(3) 1490(2) 26(1)

C(7) 3168(3) 2392(3) 2625(2) 28(1)

C(8) 2568(3) 3180(2) 1252(2) 17(1)

C(9) 2763(3) 2902(2) 444(2) 18(1)

C(10) 3421(3) 1948(2) 434(2) 19(1)

C(11) 3619(3) 1631(2) 1227(2) 19(1)

C(12) 3075(3) 2388(2) 1737(2) 18(1)

Cl(1) 0 2500 2833(1) 40(1)

Fe(1) 1759(1) 1737(1) 996(1) 15(1)

Ga(1) 0 2500 1484(1) 17(1)

O(1) 1128(2) -68(2) 1926(2) 38(1)

O(2) 529(2) 1143(2) -444(1) 37(1)

________________________________________________________________________________

Table 3. Bond lengths [Å] and angles [°] for **3**.

_____________________________________________________

C(1)-O(1) 1.143(4)

C(1)-Fe(1) 1.760(3)

C(2)-O(2) 1.150(4)

C(2)-Fe(1) 1.754(3)

C(3)-C(8) 1.508(4)

C(3)-H(3A) 0.9800

C(3)-H(3B) 0.9800

C(3)-H(3C) 0.9800

C(4)-C(9) 1.502(4)

C(4)-H(4A) 0.9800

C(4)-H(4B) 0.9800

C(4)-H(4C) 0.9800

C(5)-C(10) 1.503(4)

C(5)-H(5A) 0.9800

C(5)-H(5B) 0.9800

C(5)-H(5C) 0.9800

C(6)-C(11) 1.496(4)

C(6)-H(6A) 0.9800

C(6)-H(6B) 0.9800

C(6)-H(6C) 0.9800

C(7)-C(12) 1.508(4)

C(7)-H(7A) 0.9800

C(7)-H(7B) 0.9800

C(7)-H(7C) 0.9800

C(8)-C(12) 1.429(4)

C(8)-C(9) 1.431(4)

C(8)-Fe(1) 2.119(3)

C(9)-C(10) 1.438(4)

C(9)-Fe(1) 2.099(3)

C(10)-C(11) 1.422(4)

C(10)-Fe(1) 2.108(3)

C(11)-C(12) 1.440(4)

C(11)-Fe(1) 2.123(3)

C(12)-Fe(1) 2.109(3)

Cl(1)-Ga(1) 2.2829(11)

Fe(1)-Ga(1) 2.3524(4)

Ga(1)-Fe(1)#1 2.3524(4)

O(1)-C(1)-Fe(1) 177.4(3)

O(2)-C(2)-Fe(1) 176.4(3)

C(8)-C(3)-H(3A) 109.5

C(8)-C(3)-H(3B) 109.5

H(3A)-C(3)-H(3B) 109.5

C(8)-C(3)-H(3C) 109.5

H(3A)-C(3)-H(3C) 109.5

H(3B)-C(3)-H(3C) 109.5

C(9)-C(4)-H(4A) 109.5

C(9)-C(4)-H(4B) 109.5

H(4A)-C(4)-H(4B) 109.5

C(9)-C(4)-H(4C) 109.5

H(4A)-C(4)-H(4C) 109.5

H(4B)-C(4)-H(4C) 109.5

C(10)-C(5)-H(5A) 109.5

C(10)-C(5)-H(5B) 109.5

H(5A)-C(5)-H(5B) 109.5

C(10)-C(5)-H(5C) 109.5

H(5A)-C(5)-H(5C) 109.5

H(5B)-C(5)-H(5C) 109.5

C(11)-C(6)-H(6A) 109.5

C(11)-C(6)-H(6B) 109.5

H(6A)-C(6)-H(6B) 109.5

C(11)-C(6)-H(6C) 109.5

H(6A)-C(6)-H(6C) 109.5

H(6B)-C(6)-H(6C) 109.5

C(12)-C(7)-H(7A) 109.5

C(12)-C(7)-H(7B) 109.5

H(7A)-C(7)-H(7B) 109.5

C(12)-C(7)-H(7C) 109.5

H(7A)-C(7)-H(7C) 109.5

H(7B)-C(7)-H(7C) 109.5

C(12)-C(8)-C(9) 107.9(3)

C(12)-C(8)-C(3) 125.8(3)

C(9)-C(8)-C(3) 125.9(3)

C(12)-C(8)-Fe(1) 69.87(17)

C(9)-C(8)-Fe(1) 69.40(16)

C(3)-C(8)-Fe(1) 132.2(2)

C(8)-C(9)-C(10) 107.8(2)

C(8)-C(9)-C(4) 126.2(3)

C(10)-C(9)-C(4) 125.8(3)

C(8)-C(9)-Fe(1) 70.94(16)

C(10)-C(9)-Fe(1) 70.34(16)

C(4)-C(9)-Fe(1) 128.7(2)

C(11)-C(10)-C(9) 108.4(2)

C(11)-C(10)-C(5) 125.7(3)

C(9)-C(10)-C(5) 125.9(3)

C(11)-C(10)-Fe(1) 70.92(16)

C(9)-C(10)-Fe(1) 69.68(16)

C(5)-C(10)-Fe(1) 126.9(2)

C(10)-C(11)-C(12) 107.7(3)

C(10)-C(11)-C(6) 126.3(3)

C(12)-C(11)-C(6) 125.9(3)

C(10)-C(11)-Fe(1) 69.79(16)

C(12)-C(11)-Fe(1) 69.61(17)

C(6)-C(11)-Fe(1) 128.9(2)

C(8)-C(12)-C(11) 108.2(2)

C(8)-C(12)-C(7) 126.6(3)

C(11)-C(12)-C(7) 124.8(3)

C(8)-C(12)-Fe(1) 70.62(17)

C(11)-C(12)-Fe(1) 70.61(17)

C(7)-C(12)-Fe(1) 129.9(2)

C(2)-Fe(1)-C(1) 96.20(14)

C(2)-Fe(1)-C(9) 95.15(13)

C(1)-Fe(1)-C(9) 162.55(13)

C(2)-Fe(1)-C(10) 95.65(12)

C(1)-Fe(1)-C(10) 125.35(13)

C(9)-Fe(1)-C(10) 39.98(11)

C(2)-Fe(1)-C(12) 160.71(13)

C(1)-Fe(1)-C(12) 100.12(13)

C(9)-Fe(1)-C(12) 66.69(11)

C(10)-Fe(1)-C(12) 66.45(11)

C(2)-Fe(1)-C(8) 128.10(13)

C(1)-Fe(1)-C(8) 134.54(13)

C(9)-Fe(1)-C(8) 39.66(11)

C(10)-Fe(1)-C(8) 66.52(11)

C(12)-Fe(1)-C(8) 39.51(11)

C(2)-Fe(1)-C(11) 128.35(13)

C(1)-Fe(1)-C(11) 95.89(13)

C(9)-Fe(1)-C(11) 66.66(11)

C(10)-Fe(1)-C(11) 39.28(11)

C(12)-Fe(1)-C(11) 39.78(11)

C(8)-Fe(1)-C(11) 66.44(11)

C(2)-Fe(1)-Ga(1) 89.31(10)

C(1)-Fe(1)-Ga(1) 85.72(10)

C(9)-Fe(1)-Ga(1) 107.65(8)

C(10)-Fe(1)-Ga(1) 147.51(8)

C(12)-Fe(1)-Ga(1) 102.05(8)

C(8)-Fe(1)-Ga(1) 85.22(8)

C(11)-Fe(1)-Ga(1) 141.59(8)

Cl(1)-Ga(1)-Fe(1)#1 110.549(13)

Cl(1)-Ga(1)-Fe(1) 110.549(13)

Fe(1)#1-Ga(1)-Fe(1) 138.90(3)

_____________________________________________________________

Symmetry transformations used to generate equivalent atoms:

#1 -x,-y+1/2,z

Table 4. Anisotropic displacement parameters (Å2x 103) for **3**. The anisotropic

displacement factor exponent takes the form: -22[ h2a*2U11 + ... + 2 h k a* b* U12 ]

______________________________________________________________________________

U11 U22 U33 U23 U13 U12

______________________________________________________________________________

C(1) 16(1) 25(2) 23(1) 1(1) -1(1) 2(1)

C(2) 18(1) 27(2) 23(1) -2(1) 4(1) -1(1)

C(3) 27(2) 21(2) 30(2) -4(1) -1(1) 3(1)

C(4) 26(2) 28(2) 25(2) 9(1) 1(1) -1(1)

C(5) 26(2) 28(2) 25(2) -5(1) 13(1) 0(1)

C(6) 20(2) 24(2) 32(2) 3(1) -5(1) 2(1)

C(7) 26(2) 39(2) 18(1) -3(1) -4(1) -1(1)

C(8) 16(1) 17(1) 19(1) -1(1) 0(1) 0(1)

C(9) 18(1) 19(1) 17(1) 0(1) 2(1) -2(1)

C(10) 14(1) 24(2) 19(1) -1(1) 6(1) -2(1)

C(11) 15(1) 21(1) 21(1) 1(1) -1(1) 0(1)

C(12) 16(1) 22(1) 17(1) 0(1) 1(1) -1(1)

Cl(1) 26(1) 81(1) 13(1) 0 0 14(1)

Fe(1) 13(1) 18(1) 13(1) 1(1) 1(1) 1(1)

Ga(1) 14(1) 23(1) 13(1) 0 0 3(1)

O(1) 38(2) 33(1) 43(1) 18(1) 3(1) -3(1)

O(2) 34(1) 51(2) 25(1) -14(1) -7(1) 1(1)

______________________________________________________________________________

Table 5. Hydrogen coordinates ( x 104) and isotropic displacement parameters (Å2x 103)

for **3**.

________________________________________________________________________________

x y z U(eq)

________________________________________________________________________________

H(3A) 1757 4107 2080 39

H(3B) 1416 4415 1192 39

H(3C) 2697 4719 1542 39

H(4A) 1874 4081 -112 40

H(4B) 2086 3099 -671 40

H(4C) 3169 3867 -478 40

H(5A) 4691 1610 -400 40

H(5B) 3359 1576 -743 40

H(5C) 3840 649 -204 40

H(6A) 4256 159 1097 38

H(6B) 4028 469 2000 38

H(6C) 5172 909 1543 38

H(7A) 3882 2776 2785 41

H(7B) 3223 1679 2818 41

H(7C) 2458 2724 2850 41

________________________________________________________________________________

Table 1. Crystal data and structure refinement for **4**.

Identification code cj302

Empirical formula C56 H42 B F24 Fe2 Ga O4

Formula weight 1427.13

Temperature 150(2) K

Wavelength 0.71073 A

Crystal system, space group triclinic, P-1

Unit cell dimensions a = 14.442(3) A alpha = 66.25(3) deg.

b = 15.004(3) A beta = 71.75(3) deg.

c = 15.541(3) A gamma = 75.17(3) deg.

Volume 2894.5(10) A^3

Z, Calculated density 2, 1.637 Mg/m^3

Absorption coefficient 1.079 mm^-1

F(000) 1428

Crystal size 0.25 x 0.25 x 0.20 mm

Theta range for data collection 2.93 to 27.53 deg.

Limiting indices -18<=h<=18, -19<=k<=19, -19<=l<=20

Reflections collected / unique 43319 / 13120 [R(int) = 0.0770]

Completeness to theta = 27.53 98.3 %

Max. and min. transmission Sortav 0.810 and 0.552

Refinement method Full-matrix least-squares on F^2

Data / restraints / parameters 13120 / 24 / 861

Goodness-of-fit on F^2 1.019

Final R indices [I>2sigma(I)] R1 = 0.0443, wR2 = 0.1038

R indices (all data) R1 = 0.0599, wR2 = 0.1119

Extinction coefficient 0.0033(4)

Largest diff. peak and hole 1.069 and -0.699 e.A^-3

Table 2. Atomic coordinates ( x 10^4) and equivalent isotropic

displacement parameters (A^2 x 10^3) for **4**.

U(eq) is defined as one third of the trace of the orthogonalized

Uij tensor.

________________________________________________________________

x y z U(eq)

________________________________________________________________

Ga(1) 8494(1) 8937(1) 4959(1) 24(1)

Fe(1) 9280(1) 7950(1) 6152(1) 22(1)

Fe(2) 7727(1) 9905(1) 3753(1) 22(1)

F(1) 4847(17) 3265(15) 3690(15) 43(3)

F(1A) 4760(30) 3130(30) 3890(30) 49(6)

F(2) 6271(3) 2457(4) 3776(9) 61(3)

F(2A) 6243(6) 2685(7) 3138(14) 60(4)

F(3) 5279(7) 2654(7) 5057(4) 60(2)

F(3A) 5848(14) 2310(7) 4671(12) 73(6)

F(4) 7865(9) 4302(9) 5250(9) 53(3)

F(4A) 7729(10) 4230(7) 5361(8) 72(4)

F(5) 6490(8) 4988(14) 5817(6) 71(4)

F(5A) 6681(9) 5474(13) 5497(14) 86(4)

F(6) 7494(17) 5871(7) 4678(10) 69(4)

F(6A) 7989(10) 5649(9) 4395(7) 64(3)

F(7) 2942(2) 8581(2) 4260(2) 63(1)

F(8) 3928(2) 9452(2) 3046(2) 64(1)

F(9) 2432(2) 9555(2) 3021(2) 56(1)

F(10) 1377(2) 6805(2) 2783(2) 68(1)

F(11) 2213(2) 6971(2) 1338(2) 82(1)

F(12) 2454(2) 5640(2) 2492(2) 52(1)

F(13) 4187(1) 6567(2) -690(2) 60(1)

F(14) 5216(2) 5771(2) -1553(2) 60(1)

F(15) 5268(2) 7285(1) -1901(1) 49(1)

F(16) 8629(2) 4647(2) -1151(2) 68(1)

F(17) 8201(2) 3700(2) 278(2) 102(1)

F(18) 9009(2) 4849(2) -65(3) 91(1)

F(19) 6341(3) 10288(2) -848(2) 116(1)

F(20) 5742(3) 10562(2) 392(2) 102(1)

F(21) 7188(3) 10836(2) -327(4) 159(2)

F(22) 9920(2) 7523(2) 127(2) 76(1)

F(23) 9585(2) 6786(2) 1663(2) 57(1)

F(24) 9775(2) 8297(2) 1063(2) 63(1)

O(1) 9630(2) 9763(2) 6185(2) 35(1)

O(2) 11074(2) 7731(2) 4698(2) 54(1)

O(3) 8378(2) 11659(2) 3601(2) 42(1)

O(4) 5900(2) 10065(2) 5202(2) 58(1)

C(1) 9475(2) 9054(2) 6174(2) 25(1)

C(2) 10363(2) 7842(2) 5254(2) 33(1)

C(3) 8129(2) 10954(2) 3691(2) 29(1)

C(4) 6623(2) 10000(2) 4642(2) 35(1)

C(5) 8158(2) 7044(2) 6765(2) 26(1)

C(6) 8145(2) 7517(2) 7409(2) 28(1)

C(7) 9082(2) 7202(2) 7661(2) 31(1)

C(8) 9673(2) 6558(2) 7174(2) 31(1)

C(9) 9102(2) 6466(2) 6610(2) 28(1)

C(10) 7292(2) 7055(2) 6416(2) 35(1)

C(11) 7283(3) 8134(2) 7838(3) 43(1)

C(12) 9353(3) 7449(3) 8390(2) 50(1)

C(13) 10682(3) 6007(3) 7276(3) 49(1)

C(14) 9421(3) 5779(2) 6050(3) 41(1)

C(15) 7281(2) 9011(2) 3258(2) 29(1)

C(16) 8324(2) 8791(2) 3138(2) 30(1)

C(17) 8719(2) 9684(2) 2515(2) 32(1)

C(18) 7914(3) 10434(2) 2234(2) 35(1)

C(19) 7030(2) 10025(2) 2695(2) 33(1)

C(20) 6552(3) 8294(3) 3795(3) 43(1)

C(21) 8903(3) 7790(2) 3502(3) 44(1)

C(22) 9790(3) 9787(3) 2129(3) 48(1)

C(23) 8000(3) 11470(3) 1529(3) 55(1)

C(24) 6008(3) 10536(3) 2592(3) 54(1)

C(25) 6201(2) 5707(2) 2731(2) 24(1)

C(26) 5896(2) 4803(2) 2967(2) 30(1)

C(27) 5994(2) 4017(2) 3813(2) 33(1)

C(28) 6427(2) 4078(2) 4462(2) 34(1)

C(29) 6741(2) 4964(2) 4247(2) 29(1)

C(30) 6616(2) 5759(2) 3404(2) 25(1)

C(31) 5634(3) 3082(2) 4021(3) 52(1)

C(32) 7212(3) 5053(2) 4930(2) 42(1)

C(33) 4796(2) 7062(2) 2119(2) 21(1)

C(34) 4495(2) 7789(2) 2549(2) 23(1)

C(35) 3509(2) 8127(2) 2865(2) 24(1)

C(36) 2768(2) 7761(2) 2777(2) 25(1)

C(37) 3045(2) 7020(2) 2386(2) 24(1)

C(38) 4031(2) 6677(2) 2081(2) 24(1)

C(39) 3217(2) 8924(2) 3287(2) 35(1)

C(40) 2271(2) 6622(2) 2252(2) 34(1)

C(41) 6193(2) 6256(2) 865(2) 23(1)

C(42) 5593(2) 6533(2) 219(2) 24(1)

C(43) 5829(2) 6158(2) -524(2) 26(1)

C(44) 6699(2) 5532(2) -689(2) 28(1)

C(45) 7331(2) 5287(2) -87(2) 28(1)

C(46) 7072(2) 5623(2) 683(2) 26(1)

C(47) 5128(2) 6442(2) -1156(2) 33(1)

C(48) 8280(2) 4607(2) -231(2) 37(1)

C(49) 6679(2) 7484(2) 1374(2) 23(1)

C(50) 6366(2) 8472(2) 882(2) 30(1)

C(51) 7004(3) 9176(2) 454(2) 37(1)

C(52) 7981(3) 8919(2) 500(2) 38(1)

C(53) 8318(2) 7940(2) 970(2) 30(1)

C(54) 7681(2) 7243(2) 1397(2) 24(1)

C(55) 6625(4) 10209(3) -97(3) 62(1)

C(56) 9386(2) 7640(3) 955(2) 39(1)

B(1) 5963(2) 6640(2) 1775(2) 22(1)

________________________________________________________________

Table 3. Bond lengths [A] and angles [deg] for **4**.

_____________________________________________________________

Ga(1)-Fe(2) 2.2655(10)

Ga(1)-Fe(1) 2.2722(10)

Fe(1)-C(2) 1.763(3)

Fe(1)-C(1) 1.764(3)

Fe(1)-C(9) 2.106(3)

Fe(1)-C(6) 2.107(3)

Fe(1)-C(7) 2.113(3)

Fe(1)-C(8) 2.120(3)

Fe(1)-C(5) 2.121(3)

Fe(2)-C(3) 1.770(3)

Fe(2)-C(4) 1.771(3)

Fe(2)-C(15) 2.096(3)

Fe(2)-C(17) 2.100(3)

Fe(2)-C(19) 2.112(3)

Fe(2)-C(16) 2.117(3)

Fe(2)-C(18) 2.117(3)

F(1)-C(31) 1.31(2)

F(1A)-C(31) 1.32(4)

F(2)-C(31) 1.224(6)

F(2A)-C(31) 1.626(15)

F(3)-C(31) 1.445(7)

F(3A)-C(31) 1.236(7)

F(4)-C(32) 1.306(11)

F(4A)-C(32) 1.307(9)

F(5)-C(32) 1.429(9)

F(5A)-C(32) 1.242(9)

F(6)-C(32) 1.262(9)

F(6A)-C(32) 1.442(9)

F(7)-C(39) 1.345(4)

F(8)-C(39) 1.326(4)

F(9)-C(39) 1.335(4)

F(10)-C(40) 1.325(4)

F(11)-C(40) 1.323(4)

F(12)-C(40) 1.341(4)

F(13)-C(47) 1.331(4)

F(14)-C(47) 1.340(4)

F(15)-C(47) 1.337(3)

F(16)-C(48) 1.341(4)

F(17)-C(48) 1.283(4)

F(18)-C(48) 1.322(4)

F(19)-C(55) 1.307(5)

F(20)-C(55) 1.362(6)

F(21)-C(55) 1.270(5)

F(22)-C(56) 1.332(4)

F(23)-C(56) 1.345(4)

F(24)-C(56) 1.338(4)

O(1)-C(1) 1.150(3)

O(2)-C(2) 1.140(4)

O(3)-C(3) 1.145(3)

O(4)-C(4) 1.141(4)

C(5)-C(9) 1.424(4)

C(5)-C(6) 1.436(4)

C(5)-C(10) 1.504(4)

C(6)-C(7) 1.435(4)

C(6)-C(11) 1.496(4)

C(7)-C(8) 1.413(4)

C(7)-C(12) 1.504(4)

C(8)-C(9) 1.441(4)

C(8)-C(13) 1.501(5)

C(9)-C(14) 1.504(4)

C(15)-C(16) 1.425(4)

C(15)-C(19) 1.433(4)

C(15)-C(20) 1.507(4)

C(16)-C(17) 1.435(4)

C(16)-C(21) 1.499(4)

C(17)-C(18) 1.436(5)

C(17)-C(22) 1.497(4)

C(18)-C(19) 1.413(4)

C(18)-C(23) 1.507(4)

C(19)-C(24) 1.504(5)

C(25)-C(30) 1.392(4)

C(25)-C(26) 1.404(4)

C(25)-B(1) 1.638(4)

C(26)-C(27) 1.386(4)

C(27)-C(28) 1.385(4)

C(27)-C(31) 1.498(4)

C(28)-C(29) 1.393(4)

C(29)-C(30) 1.396(4)

C(29)-C(32) 1.491(4)

C(33)-C(38) 1.398(4)

C(33)-C(34) 1.409(4)

C(33)-B(1) 1.640(4)

C(34)-C(35) 1.385(4)

C(35)-C(36) 1.385(4)

C(35)-C(39) 1.497(4)

C(36)-C(37) 1.388(4)

C(37)-C(38) 1.384(4)

C(37)-C(40) 1.497(4)

C(41)-C(42) 1.398(4)

C(41)-C(46) 1.403(4)

C(41)-B(1) 1.646(4)

C(42)-C(43) 1.394(4)

C(43)-C(44) 1.384(4)

C(43)-C(47) 1.496(4)

C(44)-C(45) 1.390(4)

C(45)-C(46) 1.390(4)

C(45)-C(48) 1.498(4)

C(49)-C(50) 1.396(4)

C(49)-C(54) 1.408(4)

C(49)-B(1) 1.640(4)

C(50)-C(51) 1.398(4)

C(51)-C(52) 1.381(5)

C(51)-C(55) 1.492(5)

C(52)-C(53) 1.386(5)

C(53)-C(54) 1.390(4)

C(53)-C(56) 1.487(4)

Fe(2)-Ga(1)-Fe(1) 178.99(2)

C(2)-Fe(1)-C(1) 94.86(13)

C(2)-Fe(1)-C(9) 93.82(13)

C(1)-Fe(1)-C(9) 160.44(12)

C(2)-Fe(1)-C(6) 158.92(12)

C(1)-Fe(1)-C(6) 101.85(12)

C(9)-Fe(1)-C(6) 66.46(12)

C(2)-Fe(1)-C(7) 126.67(14)

C(1)-Fe(1)-C(7) 94.75(12)

C(9)-Fe(1)-C(7) 66.11(11)

C(6)-Fe(1)-C(7) 39.77(12)

C(2)-Fe(1)-C(8) 93.81(14)

C(1)-Fe(1)-C(8) 121.90(12)

C(9)-Fe(1)-C(8) 39.87(11)

C(6)-Fe(1)-C(8) 66.47(12)

C(7)-Fe(1)-C(8) 39.01(12)

C(2)-Fe(1)-C(5) 126.87(13)

C(1)-Fe(1)-C(5) 137.93(12)

C(9)-Fe(1)-C(5) 39.38(11)

C(6)-Fe(1)-C(5) 39.71(11)

C(7)-Fe(1)-C(5) 66.35(11)

C(8)-Fe(1)-C(5) 66.50(11)

C(2)-Fe(1)-Ga(1) 88.71(11)

C(1)-Fe(1)-Ga(1) 85.68(9)

C(9)-Fe(1)-Ga(1) 112.02(9)

C(6)-Fe(1)-Ga(1) 105.15(9)

C(7)-Fe(1)-Ga(1) 144.30(9)

C(8)-Fe(1)-Ga(1) 151.87(8)

C(5)-Fe(1)-Ga(1) 89.71(8)

C(3)-Fe(2)-C(4) 95.23(14)

C(3)-Fe(2)-C(15) 157.45(13)

C(4)-Fe(2)-C(15) 96.03(13)

C(3)-Fe(2)-C(17) 98.93(13)

C(4)-Fe(2)-C(17) 161.10(13)

C(15)-Fe(2)-C(17) 66.54(12)

C(3)-Fe(2)-C(19) 119.52(13)

C(4)-Fe(2)-C(19) 95.53(13)

C(15)-Fe(2)-C(19) 39.83(12)

C(17)-Fe(2)-C(19) 66.56(12)

C(3)-Fe(2)-C(16) 135.64(13)

C(4)-Fe(2)-C(16) 128.91(13)

C(15)-Fe(2)-C(16) 39.54(12)

C(17)-Fe(2)-C(16) 39.79(11)

C(19)-Fe(2)-C(16) 66.68(12)

C(3)-Fe(2)-C(18) 91.60(13)

C(4)-Fe(2)-C(18) 127.70(14)

C(15)-Fe(2)-C(18) 66.10(12)

C(17)-Fe(2)-C(18) 39.82(13)

C(19)-Fe(2)-C(18) 39.04(12)

C(16)-Fe(2)-C(18) 66.50(12)

C(3)-Fe(2)-Ga(1) 90.58(10)

C(4)-Fe(2)-Ga(1) 88.68(11)

C(15)-Fe(2)-Ga(1) 109.13(9)

C(17)-Fe(2)-Ga(1) 103.57(9)

C(19)-Fe(2)-Ga(1) 148.92(9)

C(16)-Fe(2)-Ga(1) 86.78(9)

C(18)-Fe(2)-Ga(1) 143.12(10)

O(1)-C(1)-Fe(1) 178.1(2)

O(2)-C(2)-Fe(1) 177.0(3)

O(3)-C(3)-Fe(2) 176.1(3)

O(4)-C(4)-Fe(2) 178.6(3)

C(9)-C(5)-C(6) 107.6(2)

C(9)-C(5)-C(10) 125.9(3)

C(6)-C(5)-C(10) 126.1(3)

C(9)-C(5)-Fe(1) 69.71(15)

C(6)-C(5)-Fe(1) 69.60(15)

C(10)-C(5)-Fe(1) 131.6(2)

C(7)-C(6)-C(5) 107.6(3)

C(7)-C(6)-C(11) 125.3(3)

C(5)-C(6)-C(11) 126.8(3)

C(7)-C(6)-Fe(1) 70.36(16)

C(5)-C(6)-Fe(1) 70.70(16)

C(11)-C(6)-Fe(1) 129.6(2)

C(8)-C(7)-C(6) 108.8(2)

C(8)-C(7)-C(12) 125.7(3)

C(6)-C(7)-C(12) 125.3(3)

C(8)-C(7)-Fe(1) 70.73(16)

C(6)-C(7)-Fe(1) 69.87(16)

C(12)-C(7)-Fe(1) 129.3(2)

C(7)-C(8)-C(9) 107.5(3)

C(7)-C(8)-C(13) 126.8(3)

C(9)-C(8)-C(13) 125.6(3)

C(7)-C(8)-Fe(1) 70.26(16)

C(9)-C(8)-Fe(1) 69.54(15)

C(13)-C(8)-Fe(1) 128.9(2)

C(5)-C(9)-C(8) 108.5(3)

C(5)-C(9)-C(14) 126.2(3)

C(8)-C(9)-C(14) 124.9(3)

C(5)-C(9)-Fe(1) 70.92(15)

C(8)-C(9)-Fe(1) 70.59(15)

C(14)-C(9)-Fe(1) 129.7(2)

C(16)-C(15)-C(19) 108.8(3)

C(16)-C(15)-C(20) 126.8(3)

C(19)-C(15)-C(20) 124.1(3)

C(16)-C(15)-Fe(2) 71.02(16)

C(19)-C(15)-Fe(2) 70.69(16)

C(20)-C(15)-Fe(2) 129.0(2)

C(15)-C(16)-C(17) 107.2(3)

C(15)-C(16)-C(21) 126.0(3)

C(17)-C(16)-C(21) 126.4(3)

C(15)-C(16)-Fe(2) 69.43(16)

C(17)-C(16)-Fe(2) 69.49(16)

C(21)-C(16)-Fe(2) 131.5(2)

C(16)-C(17)-C(18) 107.9(3)

C(16)-C(17)-C(22) 126.0(3)

C(18)-C(17)-C(22) 125.7(3)

C(16)-C(17)-Fe(2) 70.72(17)

C(18)-C(17)-Fe(2) 70.70(18)

C(22)-C(17)-Fe(2) 129.6(2)

C(19)-C(18)-C(17) 108.4(3)

C(19)-C(18)-C(23) 125.7(3)

C(17)-C(18)-C(23) 125.8(3)

C(19)-C(18)-Fe(2) 70.29(17)

C(17)-C(18)-Fe(2) 69.48(17)

C(23)-C(18)-Fe(2) 128.2(2)

C(18)-C(19)-C(15) 107.7(3)

C(18)-C(19)-C(24) 126.8(3)

C(15)-C(19)-C(24) 125.5(3)

C(18)-C(19)-Fe(2) 70.67(17)

C(15)-C(19)-Fe(2) 69.49(16)

C(24)-C(19)-Fe(2) 127.0(2)

C(30)-C(25)-C(26) 115.3(2)

C(30)-C(25)-B(1) 124.5(2)

C(26)-C(25)-B(1) 119.9(2)

C(27)-C(26)-C(25) 122.6(3)

C(28)-C(27)-C(26) 121.1(3)

C(28)-C(27)-C(31) 119.6(3)

C(26)-C(27)-C(31) 119.4(3)

C(27)-C(28)-C(29) 117.7(3)

C(28)-C(29)-C(30) 120.6(3)

C(28)-C(29)-C(32) 119.1(3)

C(30)-C(29)-C(32) 120.3(3)

C(25)-C(30)-C(29) 122.6(3)

F(2)-C(31)-F(3A) 62.9(7)

F(2)-C(31)-F(1) 113.1(11)

F(3A)-C(31)-F(1) 123.2(9)

F(2)-C(31)-F(1A) 114.4(18)

F(3A)-C(31)-F(1A) 111.2(15)

F(1)-C(31)-F(1A) 13(2)

F(2)-C(31)-F(3) 106.3(4)

F(3A)-C(31)-F(3) 43.5(7)

F(1)-C(31)-F(3) 103.8(10)

F(1A)-C(31)-F(3) 91.1(16)

F(2)-C(31)-C(27) 114.3(3)

F(3A)-C(31)-C(27) 121.9(4)

F(1)-C(31)-C(27) 111.0(9)

F(1A)-C(31)-C(27) 119.4(16)

F(3)-C(31)-C(27) 107.5(4)

F(2)-C(31)-F(2A) 34.1(3)

F(3A)-C(31)-F(2A) 95.4(8)

F(1)-C(31)-F(2A) 87.4(11)

F(1A)-C(31)-F(2A) 94.3(18)

F(3)-C(31)-F(2A) 136.8(4)

C(27)-C(31)-F(2A) 106.9(4)

F(5A)-C(32)-F(6) 71.9(6)

F(5A)-C(32)-F(4A) 112.5(9)

F(6)-C(32)-F(4A) 120.9(9)

F(5A)-C(32)-F(4) 117.8(8)

F(6)-C(32)-F(4) 113.0(10)

F(4A)-C(32)-F(4) 10.3(11)

F(5A)-C(32)-F(5) 32.2(5)

F(6)-C(32)-F(5) 103.5(6)

F(4A)-C(32)-F(5) 91.0(7)

F(4)-C(32)-F(5) 99.6(7)

F(5A)-C(32)-F(6A) 103.2(6)

F(6)-C(32)-F(6A) 32.9(6)

F(4A)-C(32)-F(6A) 99.5(7)

F(4)-C(32)-F(6A) 89.6(7)

F(5)-C(32)-F(6A) 132.3(5)

F(5A)-C(32)-C(29) 116.8(5)

F(6)-C(32)-C(29) 115.5(4)

F(4A)-C(32)-C(29) 113.1(6)

F(4)-C(32)-C(29) 114.9(6)

F(5)-C(32)-C(29) 108.3(6)

F(6A)-C(32)-C(29) 109.8(4)

C(38)-C(33)-C(34) 115.2(2)

C(38)-C(33)-B(1) 122.7(2)

C(34)-C(33)-B(1) 121.9(2)

C(35)-C(34)-C(33) 122.0(2)

C(34)-C(35)-C(36) 121.4(2)

C(34)-C(35)-C(39) 120.4(3)

C(36)-C(35)-C(39) 118.1(3)

C(35)-C(36)-C(37) 117.7(3)

C(38)-C(37)-C(36) 120.7(2)

C(38)-C(37)-C(40) 119.6(3)

C(36)-C(37)-C(40) 119.6(3)

C(37)-C(38)-C(33) 122.8(2)

F(8)-C(39)-F(9) 106.9(3)

F(8)-C(39)-F(7) 106.5(3)

F(9)-C(39)-F(7) 103.9(3)

F(8)-C(39)-C(35) 113.4(3)

F(9)-C(39)-C(35) 112.4(3)

F(7)-C(39)-C(35) 113.1(3)

F(11)-C(40)-F(10) 107.5(3)

F(11)-C(40)-F(12) 105.1(3)

F(10)-C(40)-F(12) 105.2(3)

F(11)-C(40)-C(37) 111.9(3)

F(10)-C(40)-C(37) 113.8(3)

F(12)-C(40)-C(37) 112.7(3)

C(42)-C(41)-C(46) 115.7(3)

C(42)-C(41)-B(1) 125.3(2)

C(46)-C(41)-B(1) 118.9(2)

C(43)-C(42)-C(41) 121.9(3)

C(44)-C(43)-C(42) 121.3(3)

C(44)-C(43)-C(47) 119.4(3)

C(42)-C(43)-C(47) 119.2(3)

C(43)-C(44)-C(45) 117.7(3)

C(46)-C(45)-C(44) 120.8(3)

C(46)-C(45)-C(48) 119.3(3)

C(44)-C(45)-C(48) 119.8(3)

C(45)-C(46)-C(41) 122.4(3)

F(13)-C(47)-F(15) 105.9(3)

F(13)-C(47)-F(14) 106.3(3)

F(15)-C(47)-F(14) 105.4(2)

F(13)-C(47)-C(43) 113.2(2)

F(15)-C(47)-C(43) 112.8(2)

F(14)-C(47)-C(43) 112.7(3)

F(17)-C(48)-F(18) 109.4(3)

F(17)-C(48)-F(16) 105.8(3)

F(18)-C(48)-F(16) 102.6(3)

F(17)-C(48)-C(45) 113.1(3)

F(18)-C(48)-C(45) 112.7(3)

F(16)-C(48)-C(45) 112.6(3)

C(50)-C(49)-C(54) 115.5(2)

C(50)-C(49)-B(1) 122.0(2)

C(54)-C(49)-B(1) 122.1(2)

C(49)-C(50)-C(51) 122.1(3)

C(52)-C(51)-C(50) 121.0(3)

C(52)-C(51)-C(55) 120.0(3)

C(50)-C(51)-C(55) 118.9(3)

C(51)-C(52)-C(53) 118.3(3)

C(52)-C(53)-C(54) 120.5(3)

C(52)-C(53)-C(56) 118.7(3)

C(54)-C(53)-C(56) 120.6(3)

C(53)-C(54)-C(49) 122.5(3)

F(21)-C(55)-F(19) 110.8(4)

F(21)-C(55)-F(20) 105.4(4)

F(19)-C(55)-F(20) 97.8(4)

F(21)-C(55)-C(51) 115.2(4)

F(19)-C(55)-C(51) 113.2(4)

F(20)-C(55)-C(51) 112.9(3)

F(22)-C(56)-F(24) 106.1(3)

F(22)-C(56)-F(23) 106.2(3)

F(24)-C(56)-F(23) 105.1(3)

F(22)-C(56)-C(53) 112.2(3)

F(24)-C(56)-C(53) 113.1(3)

F(23)-C(56)-C(53) 113.5(3)

C(25)-B(1)-C(33) 104.2(2)

C(25)-B(1)-C(49) 113.7(2)

C(33)-B(1)-C(49) 112.7(2)

C(25)-B(1)-C(41) 109.4(2)

C(33)-B(1)-C(41) 113.1(2)

C(49)-B(1)-C(41) 103.9(2)

_____________________________________________________________

Table 4. Anisotropic displacement parameters (A^2 x 10^3) for **4**.

The anisotropic displacement factor exponent takes the form:

-2 pi^2 [ h^2 a*^2 U11 + ... + 2 h k a* b* U12 ]

_______________________________________________________________________

U11 U22 U33 U23 U13 U12

_______________________________________________________________________

Ga(1) 28(1) 24(1) 22(1) -6(1) -8(1) -6(1)

Fe(1) 24(1) 21(1) 19(1) -4(1) -4(1) -7(1)

Fe(2) 23(1) 22(1) 23(1) -7(1) -6(1) -5(1)

F(1) 48(6) 31(4) 53(6) 1(4) -25(5) -19(3)

F(1A) 34(5) 35(9) 71(16) 0(9) -19(8) -16(6)

F(2) 46(2) 25(2) 104(9) -23(4) -11(3) -4(2)

F(2A) 62(4) 32(4) 87(9) -24(5) -14(5) -9(3)

F(3) 79(4) 53(4) 42(3) 12(2) -17(3) -45(3)

F(3A) 115(13) 32(4) 75(10) 19(5) -57(11) -33(6)

F(4) 36(4) 71(7) 76(6) -54(6) -28(4) 15(3)

F(4A) 129(9) 28(3) 68(5) 12(3) -79(6) -2(4)

F(5) 73(5) 108(8) 24(4) -30(4) -5(3) 2(5)

F(5A) 80(5) 120(8) 94(8) -86(6) -31(5) 20(5)

F(6) 132(9) 38(3) 55(5) 4(3) -58(6) -32(5)

F(6A) 81(6) 71(5) 49(4) 1(3) -37(4) -38(4)

F(7) 85(2) 66(2) 46(1) -38(1) -2(1) -11(1)

F(8) 41(1) 56(1) 114(2) -61(1) 5(1) -15(1)

F(9) 46(1) 36(1) 92(2) -36(1) -21(1) 14(1)

F(10) 24(1) 88(2) 115(2) -69(2) 1(1) -12(1)

F(11) 104(2) 107(2) 51(1) 3(1) -43(1) -64(2)

F(12) 46(1) 45(1) 76(2) -28(1) -13(1) -18(1)

F(13) 29(1) 111(2) 39(1) -23(1) -9(1) -17(1)

F(14) 85(2) 54(1) 66(2) -28(1) -49(1) 1(1)

F(15) 48(1) 44(1) 41(1) 10(1) -23(1) -9(1)

F(16) 51(1) 81(2) 62(2) -38(1) -2(1) 16(1)

F(17) 66(2) 33(1) 124(2) 6(1) 24(2) 17(1)

F(18) 36(1) 122(2) 162(3) -111(2) -40(2) 29(1)

F(19) 186(4) 68(2) 71(2) 18(2) -73(2) 2(2)

F(20) 135(3) 38(1) 104(2) 0(1) -48(2) 19(2)

F(21) 130(3) 48(2) 261(4) 53(2) -110(3) -48(2)

F(22) 33(1) 160(3) 57(1) -73(2) 4(1) -10(1)

F(23) 31(1) 66(1) 73(2) -24(1) -17(1) -1(1)

F(24) 45(1) 79(2) 90(2) -44(1) -19(1) -22(1)

O(1) 37(1) 28(1) 45(1) -15(1) -10(1) -8(1)

O(2) 47(2) 49(2) 49(2) -21(1) 14(1) -7(1)

O(3) 41(1) 29(1) 64(2) -18(1) -19(1) -7(1)

O(4) 31(1) 98(2) 61(2) -50(2) 6(1) -19(1)

C(1) 24(1) 25(1) 23(1) -5(1) -5(1) -4(1)

C(2) 38(2) 26(1) 29(2) -8(1) -2(1) -8(1)

C(3) 26(1) 26(1) 34(2) -9(1) -10(1) 0(1)

C(4) 27(2) 47(2) 39(2) -22(2) -7(1) -11(1)

C(5) 29(1) 23(1) 23(1) -4(1) -3(1) -11(1)

C(6) 35(2) 24(1) 21(1) -4(1) -1(1) -13(1)

C(7) 43(2) 29(1) 20(1) 1(1) -8(1) -18(1)

C(8) 33(2) 24(1) 30(2) 2(1) -12(1) -9(1)

C(9) 34(2) 20(1) 26(1) -4(1) -4(1) -10(1)

C(10) 32(2) 42(2) 35(2) -11(1) -6(1) -16(1)

C(11) 45(2) 35(2) 42(2) -17(2) 11(2) -19(2)

C(12) 78(3) 52(2) 28(2) -5(2) -18(2) -31(2)

C(13) 43(2) 35(2) 59(2) 4(2) -25(2) -4(2)

C(14) 46(2) 28(2) 48(2) -18(1) -1(2) -9(1)

C(15) 37(2) 31(1) 26(1) -11(1) -9(1) -11(1)

C(16) 40(2) 31(1) 22(1) -12(1) -5(1) -6(1)

C(17) 36(2) 41(2) 23(1) -15(1) -2(1) -12(1)

C(18) 48(2) 34(2) 22(1) -4(1) -9(1) -14(1)

C(19) 40(2) 36(2) 26(2) -7(1) -15(1) -8(1)

C(20) 53(2) 40(2) 44(2) -14(2) -11(2) -24(2)

C(21) 58(2) 36(2) 38(2) -22(2) -11(2) 6(2)

C(22) 41(2) 66(2) 44(2) -31(2) 6(2) -20(2)

C(23) 79(3) 43(2) 36(2) 5(2) -14(2) -27(2)

C(24) 51(2) 59(2) 54(2) -11(2) -34(2) -2(2)

C(25) 19(1) 20(1) 25(1) -4(1) -4(1) 0(1)

C(26) 26(1) 24(1) 36(2) -3(1) -14(1) -4(1)

C(27) 26(1) 22(1) 42(2) 1(1) -12(1) -7(1)

C(28) 33(2) 24(1) 30(2) 6(1) -10(1) -2(1)

C(29) 33(2) 24(1) 26(1) -7(1) -8(1) 2(1)

C(30) 29(1) 19(1) 23(1) -6(1) -7(1) 2(1)

C(31) 46(2) 27(2) 73(3) 11(2) -34(2) -14(2)

C(32) 66(2) 29(2) 32(2) -9(1) -23(2) 4(2)

C(33) 24(1) 16(1) 18(1) 0(1) -8(1) -1(1)

C(34) 24(1) 18(1) 24(1) -4(1) -9(1) -3(1)

C(35) 28(1) 20(1) 21(1) -5(1) -5(1) -2(1)

C(36) 21(1) 25(1) 22(1) -4(1) -3(1) -2(1)

C(37) 23(1) 26(1) 21(1) -4(1) -5(1) -6(1)

C(38) 27(1) 21(1) 23(1) -6(1) -5(1) -5(1)

C(39) 28(2) 33(2) 44(2) -20(1) -2(1) -2(1)

C(40) 29(2) 42(2) 35(2) -15(1) -6(1) -11(1)

C(41) 22(1) 18(1) 25(1) -4(1) -5(1) -3(1)

C(42) 23(1) 21(1) 23(1) -3(1) -5(1) -3(1)

C(43) 26(1) 26(1) 23(1) -4(1) -5(1) -7(1)

C(44) 31(2) 25(1) 26(1) -10(1) -3(1) -6(1)

C(45) 26(1) 25(1) 32(2) -12(1) -4(1) -3(1)

C(46) 26(1) 24(1) 30(2) -10(1) -9(1) -2(1)

C(47) 35(2) 36(2) 26(2) -6(1) -8(1) -9(1)

C(48) 34(2) 34(2) 45(2) -22(1) -8(1) 3(1)

C(49) 25(1) 23(1) 17(1) -5(1) -5(1) -4(1)

C(50) 33(2) 25(1) 27(2) -1(1) -12(1) -4(1)

C(51) 48(2) 29(2) 29(2) 4(1) -15(1) -14(1)

C(52) 43(2) 38(2) 30(2) -2(1) -5(1) -23(2)

C(53) 27(1) 42(2) 25(1) -15(1) -2(1) -11(1)

C(54) 24(1) 26(1) 22(1) -9(1) -5(1) -4(1)

C(55) 78(3) 32(2) 60(3) 14(2) -30(2) -15(2)

C(56) 30(2) 60(2) 36(2) -27(2) 0(1) -14(2)

B(1) 21(1) 19(1) 24(2) -4(1) -7(1) -2(1)

_______________________________________________________________________

Table 5. Hydrogen coordinates ( x 10^4) and isotropic

displacement parameters (A^2 x 10^3) for **4**.

________________________________________________________________

x y z U(eq)

________________________________________________________________

H(10A) 7529 6957 5792 53

H(10B) 6862 7689 6341 53

H(10C) 6922 6524 6889 53

H(11A) 6923 7713 8458 64

H(11B) 6844 8461 7395 64

H(11C) 7518 8631 7944 64

H(12A) 9010 8104 8388 75

H(12B) 10067 7445 8220 75

H(12C) 9158 6959 9035 75

H(13A) 11027 6387 7429 74

H(13B) 11055 5908 6667 74

H(13C) 10621 5366 7798 74

H(14A) 9359 5103 6499 61

H(14B) 10109 5817 5689 61

H(14C) 9002 5969 5596 61

H(20A) 5923 8629 4075 64

H(20B) 6808 7746 4313 64

H(20C) 6449 8040 3346 64

H(21A) 8544 7417 4148 66

H(21B) 9547 7857 3536 66

H(21C) 8998 7440 3060 66

H(22A) 10030 9686 1506 72

H(22B) 10164 9294 2588 72

H(22C) 9877 10448 2039 72

H(23A) 8089 11487 871 82

H(23B) 8569 11685 1565 82

H(23C) 7399 11911 1693 82

H(24A) 5968 11242 2446 81

H(24B) 5529 10262 3198 81

H(24C) 5860 10437 2065 81

H(26) 5612 4728 2530 35

H(28) 6507 3534 5035 41

H(30) 6823 6359 3284 30

H(34) 4983 8056 2624 27

H(36) 2093 8009 2976 30

H(38) 4196 6156 1834 29

H(42) 5007 6990 289 29

H(44) 6859 5278 -1196 33

H(46) 7505 5415 1101 32

H(50) 5698 8673 838 36

H(52) 8410 9400 217 45

H(54) 7932 6577 1717 29

________________________________________________________________
